# Supplementary material for: Multiple-Traits Selection in White Guinea Yam (Dioscorea rotundata) Genotypes
Source: MDPI journal article supplement (doi:10.3390/plants11213003), 2022-11-07
Supplement: s1 [file s1]

## SUPPLEMENTARY MATERIALS

**Table S1.** Eigenvectors, eigenvalues, percent variation and cumulative percent variance of phenotypic breeding values of traits measured in 36 yam genotypes

| Traits                            | PC1   | PC2   | PC3   | PC4   | PC5   | PC6   |
|-----------------------------------|-------|-------|-------|-------|-------|-------|
| Leaf chlorophyll content          | 0.18  | 0.24  | -0.20 | 0.41  | -0.21 | 0.40  |
| Stem number per plant             | 0.19  | 0.27  | -0.21 | 0.37  | -0.25 | 0.32  |
| Number of tubers per plant        | 0.10  | 0.13  | 0.53  | -0.09 | -0.08 | 0.03  |
| Tuber yield (t ha <sup>-1</sup> ) | 0.18  | -0.08 | -0.13 | -0.26 | -0.56 | -0.16 |
| Ash content (%)                   | -0.04 | -0.13 | 0.37  | -0.11 | -0.44 | 0.11  |
| Breakdown value (cP)              | 0.28  | -0.34 | 0.06  | 0.10  | 0.11  | 0.09  |
| Dry matter content (%)            | 0.33  | 0.12  | 0.18  | 0.12  | 0.15  | -0.24 |
| Final paste viscosity (cP)        | -0.04 | 0.46  | 0.19  | 0.07  | 0.06  | -0.20 |
| Flour yield (%)                   | 0.30  | 0.13  | -0.10 | -0.41 | 0.10  | 0.16  |
| Holding strength (cP)             | -0.22 | 0.39  | 0.12  | -0.03 | -0.08 | -0.23 |
| Peel loss (%)                     | -0.12 | -0.21 | 0.12  | 0.51  | -0.18 | -0.38 |
| Protein content (%)               | -0.16 | -0.31 | 0.19  | -0.09 | -0.06 | 0.43  |
| Pasting temperature (°C)          | -0.34 | 0.05  | -0.16 | -0.15 | 0.15  | 0.18  |
| Pasting time (s)                  | -0.21 | 0.38  | 0.00  | -0.17 | -0.21 | 0.13  |
| Peak viscosity (cP)               | 0.36  | -0.03 | 0.19  | 0.12  | 0.11  | 0.06  |
| Starch yield (%)                  | 0.36  | 0.15  | 0.02  | -0.14 | 0.28  | 0.00  |
| Yam mosaic virus                  | -0.31 | 0.01  | 0.07  | 0.23  | 0.36  | 0.17  |
| Stem diameter (mm)                | 0.04  | -0.09 | -0.52 | -0.06 | -0.04 | -0.31 |
| Eigenvalue                        | 5.15  | 3.30  | 2.41  | 1.70  | 1.62  | 0.96  |
| % of variance                     | 28.59 | 18.34 | 13.39 | 9.72  | 8.98  | 5.32  |
| Cumulative % of variance          | 28.59 | 46.93 | 60.32 | 70.05 | 79.03 | 84.35 |

PC=principal component

**Table S2.** BLUP values for 18 agronomic traits measured in 36 genotypes of white yam

| Genotype     | YMV     | PTEMP | PTIME | PLOSS | SCMR  | STNP | STDP | TBRNP | Yield |
|--------------|---------|-------|-------|-------|-------|------|------|-------|-------|
| TDr0000362   | 1603.50 | 81.95 | 5.30  | 22.55 | 45.06 | 2.48 | 6.12 | 2.31  | 9.71  |
| TDr04-219    | 1187.28 | 82.74 | 5.37  | 17.20 | 40.96 | 1.65 | 5.87 | 1.97  | 6.35  |
| TDr06-15     | 1135.14 | 83.62 | 5.04  | 27.60 | 43.06 | 1.27 | 6.36 | 1.34  | 4.88  |
| TDr08-21-2   | 965.91  | 81.12 | 5.06  | 22.75 | 46.34 | 1.76 | 6.31 | 1.73  | 19.33 |
| TDr08-21-3   | 1141.48 | 83.58 | 4.94  | 31.85 | 40.50 | 1.43 | 6.26 | 1.34  | 13.87 |
| TDr8902157   | 1052.83 | 81.74 | 5.12  | 20.65 | 44.47 | 1.49 | 6.70 | 1.58  | 11.01 |
| TDr8902475   | 530.79  | 80.53 | 5.12  | 37.50 | 47.23 | 2.09 | 6.48 | 2.08  | 23.06 |
| TDr8902607   | 936.28  | 83.40 | 5.36  | 18.90 | 47.29 | 1.10 | 6.85 | 1.18  | 10.85 |
| TDr8902665   | 908.28  | 80.74 | 5.02  | 24.40 | 44.20 | 2.81 | 6.03 | 2.26  | 7.85  |
| TDr8902677   | 1314.66 | 82.15 | 5.77  | 33.05 | 44.55 | 1.93 | 6.05 | 2.18  | 8.69  |
| TDr9501932   | 871.14  | 82.12 | 4.95  | 24.80 | 44.33 | 1.49 | 6.89 | 1.44  | 19.49 |
| TDr9518544   | 893.51  | 81.12 | 5.00  | 25.70 | 44.21 | 3.86 | 5.78 | 3.11  | 19.18 |
| TDr9518988   | 807.78  | 80.53 | 5.04  | 20.20 | 44.63 | 1.82 | 6.64 | 1.63  | 11.65 |
| TDr9519156   | 1406.91 | 81.57 | 4.98  | 27.60 | 43.10 | 1.82 | 6.32 | 1.81  | 12.12 |
| TDr9519158   | 896.30  | 82.39 | 5.59  | 18.20 | 43.48 | 1.49 | 6.79 | 1.60  | 18.02 |
| TDr9519177   | 1200.59 | 81.74 | 4.90  | 34.35 | 43.20 | 1.43 | 6.60 | 1.18  | 15.86 |
| TDr9600629   | 1435.79 | 83.19 | 5.06  | 33.50 | 45.36 | 1.32 | 6.37 | 1.34  | 10.75 |
| TDr9700205   | 1219.62 | 83.16 | 5.36  | 21.60 | 44.58 | 1.27 | 6.75 | 1.50  | 10.90 |
| TDr9700632   | 1445.11 | 83.63 | 5.20  | 26.35 | 46.00 | 1.10 | 6.79 | 1.15  | 11.94 |
| TDr9700793   | 1054.70 | 82.34 | 4.92  | 33.75 | 42.85 | 1.38 | 6.71 | 1.26  | 17.76 |
| TDr9700917   | 1116.73 | 84.20 | 6.06  | 16.50 | 44.28 | 1.60 | 6.89 | 1.73  | 14.42 |
| TDr9902562   | 900.56  | 82.11 | 4.95  | 36.90 | 44.72 | 1.38 | 6.75 | 1.26  | 15.09 |
| TDr9902626   | 1463.74 | 82.33 | 4.96  | 34.20 | 47.54 | 1.71 | 6.37 | 1.87  | 12.82 |
| TDr9902789   | 1430.81 | 83.38 | 5.40  | 47.40 | 43.78 | 1.19 | 6.71 | 1.26  | 14.75 |
| TDrAgbanwobe | 1444.17 | 82.52 | 5.63  | 21.75 | 44.18 | 1.21 | 6.62 | 1.26  | 8.20  |
| TDrAlumaco   | 964.32  | 81.72 | 5.44  | 29.80 | 49.08 | 1.27 | 6.24 | 1.44  | 12.44 |
| TDrEhobia    | 1159.06 | 82.20 | 5.30  | 25.75 | 44.90 | 1.76 | 5.99 | 2.00  | 12.91 |
| TDrFakesta   | 875.80  | 80.92 | 5.00  | 16.10 | 48.68 | 1.60 | 6.89 | 2.08  | 17.69 |
| TDrLeusi     | 780.36  | 83.24 | 5.18  | 17.25 | 45.41 | 1.21 | 6.54 | 1.68  | 19.57 |
| TDrMeccakusa | 699.70  | 82.40 | 5.04  | 30.30 | 45.18 | 1.16 | 7.30 | 1.29  | 15.65 |
| TDrNndu      | 718.33  | 82.61 | 5.55  | 18.20 | 45.55 | 1.32 | 6.40 | 1.13  | 23.12 |
| TDrOjuiyawo  | 1008.42 | 82.58 | 5.12  | 25.30 | 45.25 | 1.38 | 7.20 | 1.42  | 15.17 |
| TDrPampars   | 807.78  | 81.91 | 4.96  | 18.30 | 46.79 | 1.16 | 6.87 | 1.18  | 16.81 |
| TDrPouna     | 1113.40 | 81.92 | 5.08  | 15.85 | 45.25 | 1.65 | 6.50 | 1.52  | 15.51 |
| TDrUfenyi    | 1333.29 | 83.04 | 4.98  | 20.15 | 43.01 | 1.65 | 6.93 | 1.58  | 12.23 |
| TDrYangbedu  | 1006.20 | 82.55 | 4.90  | 26.60 | 43.76 | 1.21 | 7.25 | 1.26  | 10.23 |

YMV: yam mosaic virus; PTEMP: pasting temperature; PTIME: pasting time; PLOSS: peel loss; SCMR: leaf chlorophyll content; STNP: stem number per plant; STDP: stem diameter per plant; TBRNP: tuber number per plant; Yield: tuber yield;

**Table S2.** Continued.

| Geno         | DMC   | PV      | HS      | BV     | FPV     | SYLD  | FYLD  | Protein | ASHC |
|--------------|-------|---------|---------|--------|---------|-------|-------|---------|------|
| TDr0000362   | 32.11 | 2497.49 | 1771.22 | 332.81 | 3881.55 | 17.21 | 24.00 | 4.26    | 2.43 |
| TDr04-219    | 37.16 | 2636.78 | 1416.36 | 290.39 | 3764.99 | 25.23 | 26.14 | 3.47    | 2.45 |
| TDr06-15     | 30.57 | 2228.10 | 1096.44 | 344.19 | 2958.63 | 14.95 | 19.87 | 4.31    | 2.62 |
| TDr08-21-2   | 33.62 | 2909.31 | 726.08  | 443.50 | 3291.38 | 18.76 | 28.13 | 4.42    | 2.79 |
| TDr9700793   | 28.66 | 2160.03 | 658.02  | 407.55 | 2420.87 | 12.56 | 21.37 | 5.05    | 2.56 |
| TDr8902475   | 35.04 | 2525.49 | 1028.99 | 438.33 | 3134.97 | 19.07 | 29.93 | 4.10    | 2.34 |
| TDr9700632   | 37.18 | 2741.30 | 644.05  | 487.73 | 3250.16 | 17.03 | 25.41 | 4.16    | 2.64 |
| TDr9700205   | 32.39 | 2195.75 | 1676.13 | 275.65 | 3515.22 | 16.99 | 25.99 | 4.73    | 2.62 |
| TDr08-21-3   | 38.30 | 2900.62 | 707.85  | 787.11 | 3043.80 | 21.37 | 28.76 | 4.47    | 2.43 |
| TDr9519158   | 30.17 | 2048.50 | 1725.95 | 147.88 | 3528.32 | 13.54 | 18.99 | 4.11    | 2.89 |
| TDr9518988   | 34.27 | 2266.00 | 884.98  | 499.37 | 2647.71 | 19.60 | 26.38 | 4.37    | 3.03 |
| TDr8902157   | 34.68 | 2627.60 | 561.11  | 652.23 | 2604.31 | 18.54 | 26.48 | 4.69    | 3.56 |
| TDr8902665   | 35.93 | 2586.32 | 802.34  | 474.28 | 2962.18 | 21.29 | 30.22 | 4.22    | 2.45 |
| TDr8902677   | 33.88 | 2223.75 | 723.65  | 389.96 | 2570.46 | 17.65 | 26.72 | 4.00    | 2.72 |
| TDr9501932   | 31.15 | 2238.00 | 1649.39 | 228.83 | 3588.38 | 16.06 | 28.66 | 3.90    | 2.61 |
| TDr9518544   | 29.32 | 2365.21 | 772.56  | 496.78 | 2661.63 | 15.00 | 23.03 | 4.53    | 2.67 |
| TDr9519156   | 33.29 | 2013.74 | 946.05  | 257.80 | 2672.28 | 16.19 | 26.86 | 4.37    | 2.52 |
| TDr9519177   | 30.16 | 2221.58 | 915.66  | 334.87 | 2798.67 | 15.79 | 24.73 | 3.95    | 2.49 |
| TDr9600629   | 28.60 | 2275.65 | 751.90  | 369.01 | 2676.65 | 15.26 | 25.55 | 4.32    | 2.35 |
| TDr9700917   | 30.00 | 2248.62 | 1026.56 | 429.80 | 2828.69 | 14.60 | 20.79 | 4.05    | 2.68 |
| TDr9902562   | 27.85 | 2005.78 | 1369.88 | 170.64 | 3136.06 | 14.33 | 24.82 | 4.37    | 2.74 |
| TDr8902607   | 32.93 | 2227.13 | 798.09  | 402.12 | 2628.33 | 13.98 | 23.07 | 4.26    | 2.50 |
| TDr9902626   | 32.74 | 2403.59 | 763.75  | 436.78 | 2760.45 | 15.17 | 20.89 | 4.21    | 2.55 |
| TDr9902789   | 33.65 | 2246.93 | 1617.49 | 343.67 | 3448.61 | 12.52 | 17.49 | 3.89    | 2.83 |
| TDrAgbanwobe | 27.66 | 2134.68 | 1038.71 | 201.16 | 2952.08 | 14.20 | 22.93 | 4.95    | 2.56 |
| TDrAlumaco   | 34.63 | 2385.24 | 749.17  | 299.70 | 2871.28 | 18.19 | 24.24 | 3.36    | 2.80 |
| TDrEhobia    | 33.40 | 2168.47 | 1444.92 | 299.96 | 3250.98 | 16.15 | 28.18 | 4.47    | 2.91 |
| TDrFakesta   | 33.02 | 2461.77 | 958.20  | 419.71 | 3018.95 | 21.15 | 28.18 | 3.95    | 2.30 |
| TDrLeusi     | 32.65 | 2166.06 | 752.21  | 351.17 | 2571.82 | 18.58 | 30.02 | 3.94    | 2.39 |
| TDrMeccakusa | 30.71 | 2469.25 | 693.57  | 518.25 | 2685.65 | 16.02 | 25.94 | 4.37    | 2.48 |
| TDrNndu      | 34.68 | 2229.06 | 1631.77 | 185.12 | 3608.58 | 18.27 | 31.04 | 4.21    | 2.71 |
| TDrOjuiyawo  | 34.32 | 2392.25 | 682.03  | 416.86 | 2695.21 | 18.85 | 27.16 | 3.79    | 2.45 |
| TDrPampars   | 32.62 | 2671.29 | 657.11  | 651.97 | 2740.25 | 20.27 | 27.35 | 4.42    | 2.73 |
| TDrPouna     | 32.17 | 2563.15 | 649.21  | 589.38 | 2676.92 | 18.67 | 29.44 | 3.79    | 2.30 |
| TDrUfenyi    | 36.89 | 2483.97 | 768.46  | 508.94 | 3044.34 | 20.44 | 27.06 | 3.79    | 2.65 |
| TDrYangbedu  | 35.68 | 2437.87 | 744.31  | 566.36 | 2644.98 | 19.47 | 27.25 | 4.48    | 2.54 |

DMC: dry matter content; BV: breakdown value; FPV: final paste viscosity; FYLD: flour yield; ASHC: ash content; SYLD: starch yield; PV: peak viscosity; HS: holding strength; Protein: protein content

**Table S3.** Description of breeding lines utilized for the study

| SN | Genotype            | Status   | Pedigree                |
|----|---------------------|----------|-------------------------|
| 1  | TDr0000362          | Improved | TDr9505576/TDr9800062   |
| 2  | TDr04-219 (Amula)   | Landrace | Unknown                 |
| 3  | TDr06-15            | Landrace | Unknown                 |
| 4  | TDr08-21-2 (Ekpe-I) | Landrace | Unknown                 |
| 5  | TDr08-21-3(Ekpe-II) | Landrace | Unknown                 |
| 6  | TDr8902157          | Improved | Unknown                 |
| 7  | TDr8902475          | Improved | Unknown                 |
| 8  | TDr8902607          | Improved | Unknown                 |
| 9  | TDr8902665          | Improved | Nsukka/Unknown (OP)     |
| 10 | TDr8902677          | Improved | Unknown                 |
| 11 | TDr9501932          | Improved | TDr8600309/Unknown (OP) |
| 12 | TDr9518544          | Improved | TDr8700571/Unknown (OP) |
| 13 | TDr9518988          | Improved | TDr8700571/Unknown (OP) |
| 14 | TDr9519156          | Improved | Unknown                 |
| 15 | TDr9519158          | Improved | TDr8700334/Unknown (OP) |
| 16 | TDr9519177          | Improved | Unknown                 |
| 17 | TDr9600629          | Improved | TDr93:1/Unknown (OP)    |
| 18 | TDr9700205          | Improved | TDr8700839/TDr8700552   |
| 19 | TDr9700632          | Improved | TDr93:24/TDr8902494     |
| 20 | TDr9700793          | Improved | TDr93:23/Unknown (OP)   |
| 21 | TDr9700917          | Improved | TDr8901892/IN94R-2      |
| 22 | TDr9902562          | Improved | TDr93:1/TDr9500858      |
| 23 | TDr9902626          | Improved | TDr93:25/TDr9500858     |
| 24 | TDr9902789          | Improved | TDr93:50/TDr9502026     |
| 25 | Agbanwobe           | Landrace | Unknown                 |
| 26 | Alumaco             | Landrace | Unknown                 |
| 27 | Ehobia              | Landrace | Unknown                 |
| 28 | Fakesta             | Landrace | Unknown                 |
| 29 | Leusi               | Landrace | Unknown                 |
| 30 | Meccakusa           | Landrace | Unknown                 |
| 31 | Nndu                | Landrace | Unknown                 |
| 32 | Ojuiyawo            | Landrace | Unknown                 |
| 33 | Pampars             | Landrace | Unknown                 |
| 34 | Pouna               | Landrace | Unknown                 |
| 35 | Ufenyi              | Landrace | Unknown                 |
| 36 | Yangbedu            | Landrace | Unknown                 |

**Table S4.** Phenotypic traits measured in 36 white yam genotypes

| SN | Trait/ descriptor                     | Trait acronym | Score code – descriptor state                                                               | Sample/time collected                                     |
|----|---------------------------------------|---------------|---------------------------------------------------------------------------------------------|-----------------------------------------------------------|
| 1  | Leaf chlorophyll content (SPAD value) | SCMR          | direct measurement (measured on 3 fully opened leaves using SPAD Chlorophyll meter reading) | on 8 plants at 5 MAP                                      |
| 2  | Stem number per plant                 | STNP          | direct measurement: done by counting                                                        | on 8 plants at 5 MAP                                      |
| 3  | Stem diameter per plant (cm)          | STDP          | direct measurement: done using vernier caliper                                              | on 5 plants at 5 MAP                                      |
| 4  | Yam mosaic virus severity             | YMV           | 1=no visible symptom of disease; 2=mild; 3=low; 4=intermediate; 5=high                      | on 8 plants at 60, 75, 90, 105, 120, 135, 165 and 180 DAP |
| 5  | Tuber yield (t ha <sup>-1</sup> )     | TBRYLD        | direct measurement                                                                          |                                                           |
| 6  | Number of tubers per plant            | TBRNP         | direct measurement: done by counting                                                        |                                                           |
| 7  | Dry matter content (%)                | DMC           | direct measurement                                                                          |                                                           |
| 8  | Peel loss (%)                         | PLOSS         | direct measurement                                                                          |                                                           |
| 9  | Starch yield (%)                      | SYLD          | direct measurement                                                                          |                                                           |
| 10 | Pasting temperature (°C)              | PTEMP         | direct measurement                                                                          |                                                           |
| 11 | Pasting time (s)                      | PTIME         | direct measurement                                                                          |                                                           |
| 12 | Peak viscosity (cP)                   | PV            | direct measurement                                                                          |                                                           |
| 13 | Holding strength (cP)                 | HS            | direct measurement                                                                          |                                                           |
| 14 | Breakdown value (cP)                  | BV            | direct measurement                                                                          |                                                           |
| 15 | Final paste viscosity (cP)            | FPV           | direct measurement                                                                          |                                                           |
| 16 | Flour yield (%)                       | FYLD          | direct measurement                                                                          |                                                           |
| 17 | Ash content (%)                       | ASHC          | direct measurement                                                                          |                                                           |
| 18 | Protein content (%)                   | PROTEINC      | direct measurement                                                                          |                                                           |

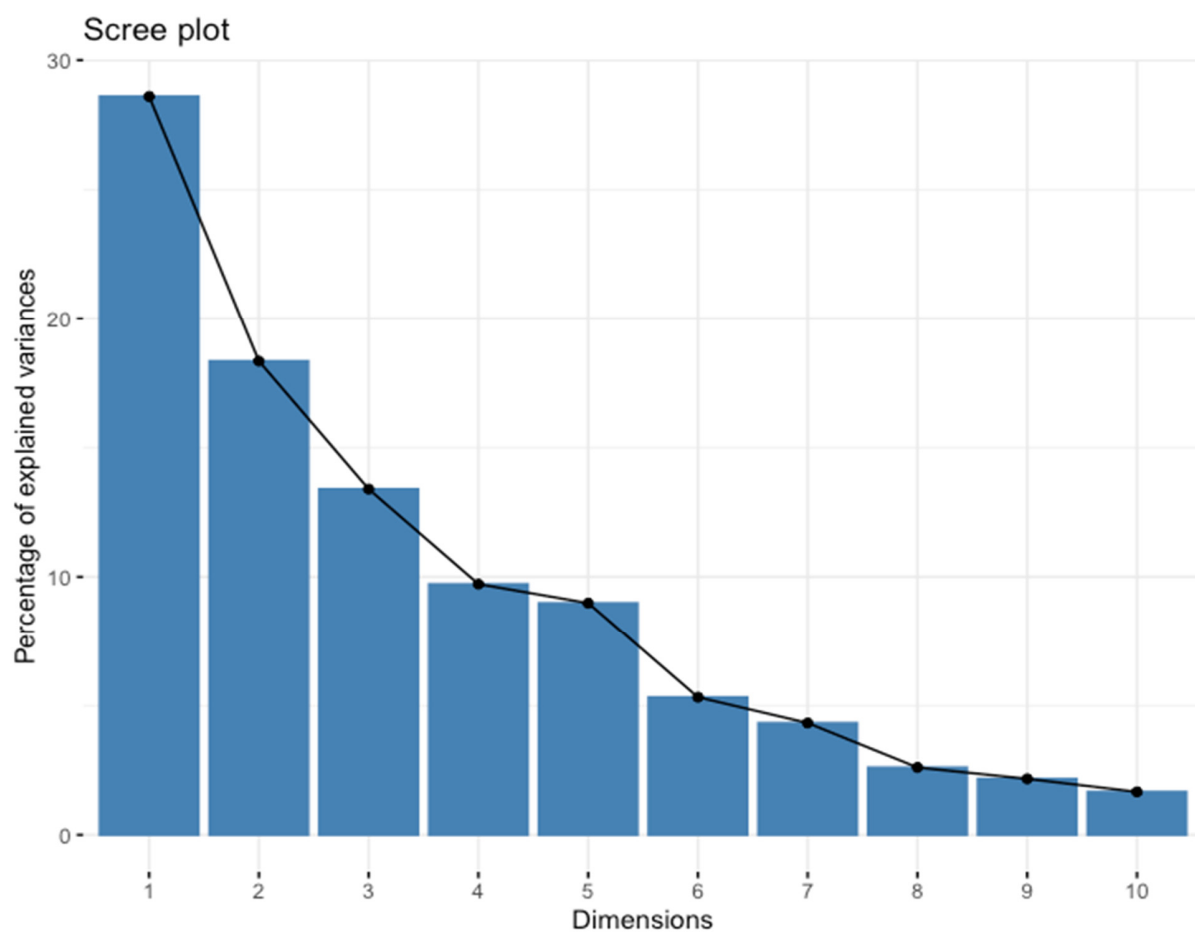

**Figure S1.** Scree plot of percent variation versus principal components of phenotypic breeding values of traits measured in 36 yam genotypes
